# Supplementary material for: Advancing science or advancing careers? Researchers’ opinions on success indicators
Source: bioRxiv or medRxiv preprint supplement (doi:10.1101/2020.06.22.165654), 2020-11-24
Supplement: Supplementary file [file media-1.pdf]

# SUPPORTING MATERIAL S1

## PRINTOUT OF THE SURVEY

---

### Start of Block: Introduction

Welcome to our Survey for the project [Re-SInC](#).

The survey aims to rethink research assessments and research careers. We want to know what **you** think.

You may find the [full information for participation here](#).

To make this short, we thought we would give you three reasons for taking part in this survey!

- We need your input to know what really matters in research.
- It will only take 15-20 minutes of your time (we tested it with a few people, and it never took more than 16 minutes!).

You will help a very grateful PhD student graduate!

Note on ethics and privacy: This project has been approved by the Medical Ethics Committee of Hasselt University, protocol number CME2019/O35. Answers to the survey will be **fully confidential**, and **no identifiable information** (e.g., IP addresses, emails, etc.) is collected in the survey. The dataset, which contains **no identifiable information**, will be made public when findings are published.

Closing date: October 31st 2019

**If possible, use a computer to complete this questionnaire.**

If you only have a phone at hand, you should use the landscape mode.

### End of Block: Introduction

---

### Start of Block: Demographics

Before we start, we would like to get to [know you](#)!

You are a...

- PhD Student
  - PostDoc / Non-tenure-track position
  - Tenure-track researcher / Professor
  - Tenured researcher / Full professor
  - I was a researcher in the past, but moved to another career
  - Other (specify) \_\_\_\_\_
-

Display This Question:

If Before we start, we would like to get to know you! You are a... = PhD Student

Or Before we start, we would like to get to know you! You are a... = PostDoc / Non-tenure-track position

Or Before we start, we would like to get to know you! You are a... = Tenure-track researcher / Professor

Or Before we start, we would like to get to know you! You are a... = Tenured researcher / Full professor

Or Before we start, we would like to get to know you! You are a... = Other (specify)

You have been in this position for ...

▼ less than one year ... 9 years or more

Display This Question:

If Before we start, we would like to get to know you! You are a... = I was a researcher in the past, but moved to another career

How long ago did you stop being a researcher?

▼ less than one year ... 9 years or more

Display This Question:

If Before we start, we would like to get to know you! You are a... = I was a researcher in the past, but moved to another career

As someone who left academia your opinion is also very important to us! **Please answer the rest of this survey thinking back at your time as a researcher.**

Example: Read '**Are you** affiliated with a Flemish University or scientific institute?' as '**Were you** affiliated with a Flemish University or scientific institute?'

Are you affiliated with a Flemish University or scientific institute?

- Yes
- No

Display This Question:

If Are you affiliated with a Flemish University or scientific institute? = Yes

Your main affiliation is at...

- Hasselt University
- VU Brussels
- University of Antwerp
- Ghent University
- KU Leuven
- IMEC
- Institute of Tropical Medicine Antwerp
- Other \_\_\_\_\_

Display This Question:

If Are you affiliated with a Flemish University or scientific institute? = No

Your main affiliation is at:

- Institution \_\_\_\_\_
- Country \_\_\_\_\_

You are in the Faculty of...

- Medicine / Medicine and Health Sciences / Medicine and Life Sciences / Medicine and Pharmacy (or equivalent)
- Other \_\_\_\_\_

And you have published ...

▼ ...fewer than 10 peer-reviewed papers ... ...over 210 peer-reviewed papers

Your gender is...

- Male
- Female
- Other
- Prefer not to answer

Are you currently working in your country of origin?

- No
- Yes

Display This Question:

If Are you currently working in your country of origin? = No

X→ X→

What is your country of origin?

▼ Prefer not to say / Afghanistan ... Zimbabwe

Display This Question:

If Are you currently working in your country of origin? = No

Have you worked as a researcher/research student in your country of origin?

- Yes
- No

Have you ever been involved in **evaluating researchers for promotion, tenure, or career advancement**?

- Yes
- No
- Not sure (explain) \_\_\_\_\_

End of Block: Demographics

---

Start of Block: Time management

Allright! Now we would like to know how you spend your time as a researcher.

Do you work full time as a researcher/PhD student?

- Yes
- No

Display This Question:

If Allright! Now we would like to know how you spend your time as a researcher. Do you work full tim... = No

Where would you situate yourself?

▼ less than 25% research employment ... over 75% but less than 100% research employment

On average, **HOW MANY HOURS** per week **do you work?** (overtime included)

I really work...

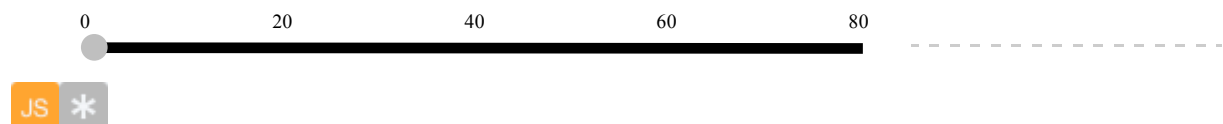

And during your work time, what **PERCENTAGE (%)** of **your time** do you spend on the following three pillars **in reality**, and **how would you like it to be**?

**In reality...**

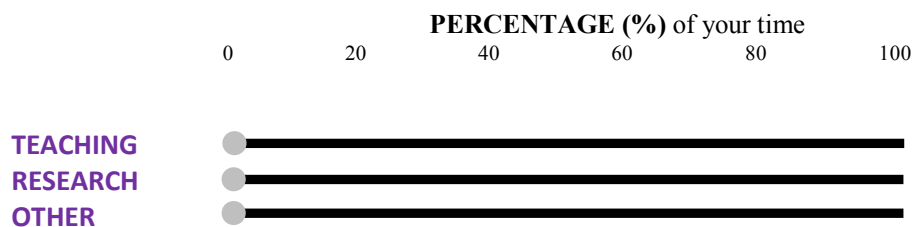

JS \*

In my ideal world...

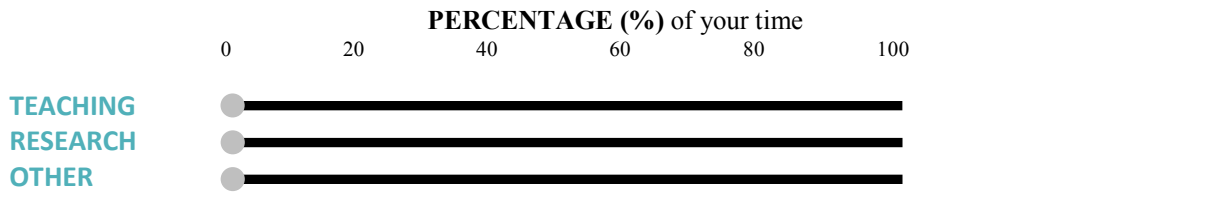

Page Break

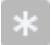

And now a little more into the details:

What PERCENTAGE (%) of your time would you say you spend on average on each of the following activities **in reality**, and **how would you like it to be**?

In reality...

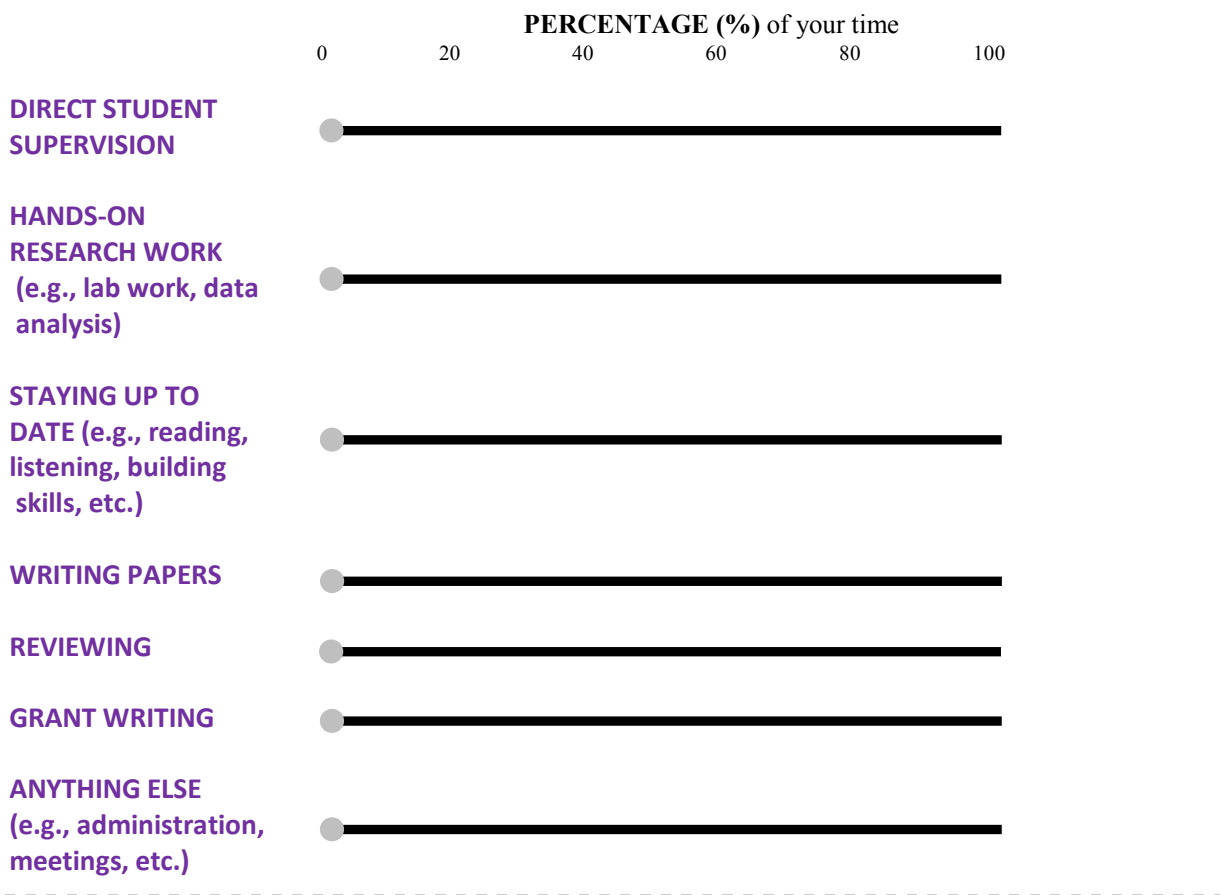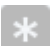

In your ideal world...

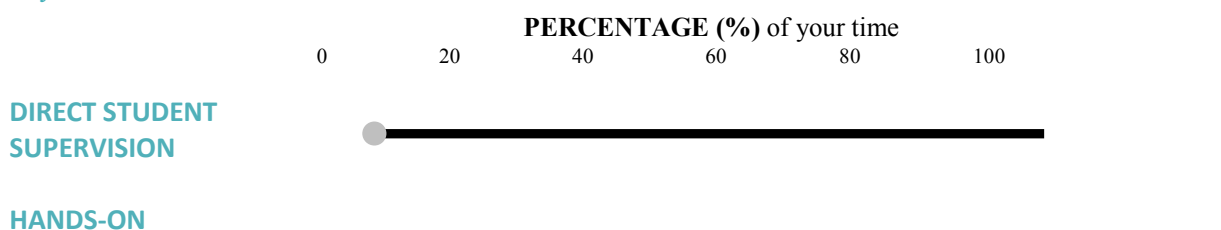

RESEARCH WORK  
(e.g., lab work, data analysis)

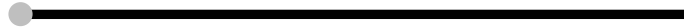

STAYING UP TO  
DATE (e.g., reading,  
listening, building  
skills, etc.)

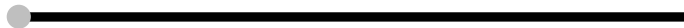

WRITING PAPERS

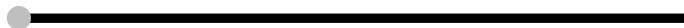

REVIEWING

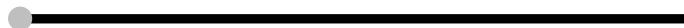

GRANT WRITING

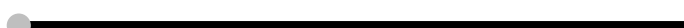

ANYTHING ELSE  
(e.g., administration,  
meetings, etc.)

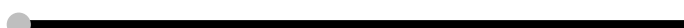

End of Block: Time management

---

Start of Block: Statements

Great! Now that we know each other, let's get to business!

In the following questions, we wish to know the impact of typical research activities

(A) on **advancing your career**

(B) on **advancing science**, and

(C) on **your personal satisfaction**

There will be **18 research activities** to rate. We numbered them from 18 to 1 so you know how many you have left!

---

Page Break

---

**18. Publishing papers is...**

|                                               | essential             | important             | irrelevant            | unfavorable           | detrimental           |
|-----------------------------------------------|-----------------------|-----------------------|-----------------------|-----------------------|-----------------------|
| <b>...in<br/>advancing my<br/>career</b>      | <input type="radio"/> | <input type="radio"/> | <input type="radio"/> | <input type="radio"/> | <input type="radio"/> |
| <b>...in<br/>advancing<br/>science</b>        | <input type="radio"/> | <input type="radio"/> | <input type="radio"/> | <input type="radio"/> | <input type="radio"/> |
| <b>...to my<br/>personal<br/>satisfaction</b> | <input type="radio"/> | <input type="radio"/> | <input type="radio"/> | <input type="radio"/> | <input type="radio"/> |

---

Feel free to leave a comment (optional)

---

**17. Publishing in high impact journals is...**

|                                      | essential             | important             | irrelevant            | unfavorable           | detrimental           |
|--------------------------------------|-----------------------|-----------------------|-----------------------|-----------------------|-----------------------|
| ...in<br>advancing my<br>career      | <input type="radio"/> | <input type="radio"/> | <input type="radio"/> | <input type="radio"/> | <input type="radio"/> |
| ...in<br>advancing<br>science        | <input type="radio"/> | <input type="radio"/> | <input type="radio"/> | <input type="radio"/> | <input type="radio"/> |
| ...to my<br>personal<br>satisfaction | <input type="radio"/> | <input type="radio"/> | <input type="radio"/> | <input type="radio"/> | <input type="radio"/> |

Feel free to leave a comment (optional)

---

**16. Publishing commentaries or editorials is...**

|                                      | essential             | important             | irrelevant            | unfavorable           | detrimental           |
|--------------------------------------|-----------------------|-----------------------|-----------------------|-----------------------|-----------------------|
| ...in<br>advancing my<br>career      | <input type="radio"/> | <input type="radio"/> | <input type="radio"/> | <input type="radio"/> | <input type="radio"/> |
| ...in<br>advancing<br>science        | <input type="radio"/> | <input type="radio"/> | <input type="radio"/> | <input type="radio"/> | <input type="radio"/> |
| ...to my<br>personal<br>satisfaction | <input type="radio"/> | <input type="radio"/> | <input type="radio"/> | <input type="radio"/> | <input type="radio"/> |

Feel free to leave a comment (optional)

---

**15. Publishing more papers than others is...**

|                                      | essential             | important             | irrelevant            | unfavorable           | detrimental           |
|--------------------------------------|-----------------------|-----------------------|-----------------------|-----------------------|-----------------------|
| ...in<br>advancing my<br>career      | <input type="radio"/> | <input type="radio"/> | <input type="radio"/> | <input type="radio"/> | <input type="radio"/> |
| ...in<br>advancing<br>science        | <input type="radio"/> | <input type="radio"/> | <input type="radio"/> | <input type="radio"/> | <input type="radio"/> |
| ...to my<br>personal<br>satisfaction | <input type="radio"/> | <input type="radio"/> | <input type="radio"/> | <input type="radio"/> | <input type="radio"/> |

Feel free to leave a comment (optional)

---

**14. Publishing open access is...**

|                                      | essential             | important             | irrelevant            | unfavorable           | detrimental           |
|--------------------------------------|-----------------------|-----------------------|-----------------------|-----------------------|-----------------------|
| ...in<br>advancing my<br>career      | <input type="radio"/> | <input type="radio"/> | <input type="radio"/> | <input type="radio"/> | <input type="radio"/> |
| ...in<br>advancing<br>science        | <input type="radio"/> | <input type="radio"/> | <input type="radio"/> | <input type="radio"/> | <input type="radio"/> |
| ...to my<br>personal<br>satisfaction | <input type="radio"/> | <input type="radio"/> | <input type="radio"/> | <input type="radio"/> | <input type="radio"/> |

Feel free to leave a comment (optional)

---



### 13. Peer reviewing is...

|                                      | essential             | important             | irrelevant            | unfavorable           | detrimental           |
|--------------------------------------|-----------------------|-----------------------|-----------------------|-----------------------|-----------------------|
| ...in<br>advancing my<br>career      | <input type="radio"/> | <input type="radio"/> | <input type="radio"/> | <input type="radio"/> | <input type="radio"/> |
| ...in<br>advancing<br>science        | <input type="radio"/> | <input type="radio"/> | <input type="radio"/> | <input type="radio"/> | <input type="radio"/> |
| ...to my<br>personal<br>satisfaction | <input type="radio"/> | <input type="radio"/> | <input type="radio"/> | <input type="radio"/> | <input type="radio"/> |

Feel free to leave a comment (optional)

### 12. Replicating past research is...

|                                      | essential             | important             | irrelevant            | unfavorable           | detrimental           |
|--------------------------------------|-----------------------|-----------------------|-----------------------|-----------------------|-----------------------|
| ...in<br>advancing my<br>career      | <input type="radio"/> | <input type="radio"/> | <input type="radio"/> | <input type="radio"/> | <input type="radio"/> |
| ...in<br>advancing<br>science        | <input type="radio"/> | <input type="radio"/> | <input type="radio"/> | <input type="radio"/> | <input type="radio"/> |
| ...to my<br>personal<br>satisfaction | <input type="radio"/> | <input type="radio"/> | <input type="radio"/> | <input type="radio"/> | <input type="radio"/> |

Feel free to leave a comment (optional)

**11. Publishing findings that did not work (i.e., negative findings) is...**

|                                      | essential             | important             | irrelevant            | unfavorable           | detrimental           |
|--------------------------------------|-----------------------|-----------------------|-----------------------|-----------------------|-----------------------|
| ...in<br>advancing my<br>career      | <input type="radio"/> | <input type="radio"/> | <input type="radio"/> | <input type="radio"/> | <input type="radio"/> |
| ...in<br>advancing<br>science        | <input type="radio"/> | <input type="radio"/> | <input type="radio"/> | <input type="radio"/> | <input type="radio"/> |
| ...to my<br>personal<br>satisfaction | <input type="radio"/> | <input type="radio"/> | <input type="radio"/> | <input type="radio"/> | <input type="radio"/> |

Feel free to leave a comment (optional)

---

**10. Sharing your full data and detailed methods is...**

|                                      | essential             | important             | irrelevant            | unfavorable           | detrimental           |
|--------------------------------------|-----------------------|-----------------------|-----------------------|-----------------------|-----------------------|
| ...in<br>advancing my<br>career      | <input type="radio"/> | <input type="radio"/> | <input type="radio"/> | <input type="radio"/> | <input type="radio"/> |
| ...in<br>advancing<br>science        | <input type="radio"/> | <input type="radio"/> | <input type="radio"/> | <input type="radio"/> | <input type="radio"/> |
| ...to my<br>personal<br>satisfaction | <input type="radio"/> | <input type="radio"/> | <input type="radio"/> | <input type="radio"/> | <input type="radio"/> |

Feel free to leave a comment (optional)

---

**9. Reviewing raw data from students and collaborators is...**

|                                               | essential             | important             | irrelevant            | unfavorable           | detrimental           |
|-----------------------------------------------|-----------------------|-----------------------|-----------------------|-----------------------|-----------------------|
| <b>...in<br/>advancing my<br/>career</b>      | <input type="radio"/> | <input type="radio"/> | <input type="radio"/> | <input type="radio"/> | <input type="radio"/> |
| <b>...in<br/>advancing<br/>science</b>        | <input type="radio"/> | <input type="radio"/> | <input type="radio"/> | <input type="radio"/> | <input type="radio"/> |
| <b>...to my<br/>personal<br/>satisfaction</b> | <input type="radio"/> | <input type="radio"/> | <input type="radio"/> | <input type="radio"/> | <input type="radio"/> |

Feel free to leave a comment (optional)

**8. Conducting innovative research with a high risks of failure is...**

|                                               | essential             | important             | irrelevant            | unfavorable           | detrimental           |
|-----------------------------------------------|-----------------------|-----------------------|-----------------------|-----------------------|-----------------------|
| <b>...in<br/>advancing my<br/>career</b>      | <input type="radio"/> | <input type="radio"/> | <input type="radio"/> | <input type="radio"/> | <input type="radio"/> |
| <b>...in<br/>advancing<br/>science</b>        | <input type="radio"/> | <input type="radio"/> | <input type="radio"/> | <input type="radio"/> | <input type="radio"/> |
| <b>...to my<br/>personal<br/>satisfaction</b> | <input type="radio"/> | <input type="radio"/> | <input type="radio"/> | <input type="radio"/> | <input type="radio"/> |

Feel free to leave a comment (optional)

**7. Connecting with renowned researchers is...**

|                                               | essential             | important             | irrelevant            | unfavorable           | detrimental           |
|-----------------------------------------------|-----------------------|-----------------------|-----------------------|-----------------------|-----------------------|
| <b>...in<br/>advancing my<br/>career</b>      | <input type="radio"/> | <input type="radio"/> | <input type="radio"/> | <input type="radio"/> | <input type="radio"/> |
| <b>...in<br/>advancing<br/>science</b>        | <input type="radio"/> | <input type="radio"/> | <input type="radio"/> | <input type="radio"/> | <input type="radio"/> |
| <b>...to my<br/>personal<br/>satisfaction</b> | <input type="radio"/> | <input type="radio"/> | <input type="radio"/> | <input type="radio"/> | <input type="radio"/> |

Feel free to leave a comment (optional)

---

**6. Collaborating across borders, disciplines, and sectors is...**

|                                               | essential             | important             | irrelevant            | unfavorable           | detrimental           |
|-----------------------------------------------|-----------------------|-----------------------|-----------------------|-----------------------|-----------------------|
| <b>...in<br/>advancing my<br/>career</b>      | <input type="radio"/> | <input type="radio"/> | <input type="radio"/> | <input type="radio"/> | <input type="radio"/> |
| <b>...in<br/>advancing<br/>science</b>        | <input type="radio"/> | <input type="radio"/> | <input type="radio"/> | <input type="radio"/> | <input type="radio"/> |
| <b>...to my<br/>personal<br/>satisfaction</b> | <input type="radio"/> | <input type="radio"/> | <input type="radio"/> | <input type="radio"/> | <input type="radio"/> |

Feel free to leave a comment (optional)

---

#### 5. Getting cited in scientific literature is...

|                                      | essential             | important             | irrelevant            | unfavorable           | detrimental           |
|--------------------------------------|-----------------------|-----------------------|-----------------------|-----------------------|-----------------------|
| ...in<br>advancing my<br>career      | <input type="radio"/> | <input type="radio"/> | <input type="radio"/> | <input type="radio"/> | <input type="radio"/> |
| ...in<br>advancing<br>science        | <input type="radio"/> | <input type="radio"/> | <input type="radio"/> | <input type="radio"/> | <input type="radio"/> |
| ...to my<br>personal<br>satisfaction | <input type="radio"/> | <input type="radio"/> | <input type="radio"/> | <input type="radio"/> | <input type="radio"/> |

Feel free to leave a comment (optional)

---

#### 4. Having your papers read and downloaded is...

|                                      | essential             | important             | irrelevant            | unfavorable           | detrimental           |
|--------------------------------------|-----------------------|-----------------------|-----------------------|-----------------------|-----------------------|
| ...in<br>advancing my<br>career      | <input type="radio"/> | <input type="radio"/> | <input type="radio"/> | <input type="radio"/> | <input type="radio"/> |
| ...in<br>advancing<br>science        | <input type="radio"/> | <input type="radio"/> | <input type="radio"/> | <input type="radio"/> | <input type="radio"/> |
| ...to my<br>personal<br>satisfaction | <input type="radio"/> | <input type="radio"/> | <input type="radio"/> | <input type="radio"/> | <input type="radio"/> |

Feel free to leave a comment (optional)

---

**3. Having public outreach (e.g., social media, news, etc.) is...**

|                                               | essential             | important             | irrelevant            | unfavorable           | detrimental           |
|-----------------------------------------------|-----------------------|-----------------------|-----------------------|-----------------------|-----------------------|
| <b>...in<br/>advancing my<br/>career</b>      | <input type="radio"/> | <input type="radio"/> | <input type="radio"/> | <input type="radio"/> | <input type="radio"/> |
| <b>...in<br/>advancing<br/>science</b>        | <input type="radio"/> | <input type="radio"/> | <input type="radio"/> | <input type="radio"/> | <input type="radio"/> |
| <b>...to my<br/>personal<br/>satisfaction</b> | <input type="radio"/> | <input type="radio"/> | <input type="radio"/> | <input type="radio"/> | <input type="radio"/> |

Feel free to leave a comment (optional)

---

**2. Having your results used or implemented in practice is...**

|                                               | essential             | important             | irrelevant            | unfavorable           | detrimental           |
|-----------------------------------------------|-----------------------|-----------------------|-----------------------|-----------------------|-----------------------|
| <b>...in<br/>advancing my<br/>career</b>      | <input type="radio"/> | <input type="radio"/> | <input type="radio"/> | <input type="radio"/> | <input type="radio"/> |
| <b>...in<br/>advancing<br/>science</b>        | <input type="radio"/> | <input type="radio"/> | <input type="radio"/> | <input type="radio"/> | <input type="radio"/> |
| <b>...to my<br/>personal<br/>satisfaction</b> | <input type="radio"/> | <input type="radio"/> | <input type="radio"/> | <input type="radio"/> | <input type="radio"/> |

Feel free to leave a comment (optional)

---

---

**1. Having luck is...**

|                                               | essential             | important             | irrelevant            | unfavorable           | detrimental           |
|-----------------------------------------------|-----------------------|-----------------------|-----------------------|-----------------------|-----------------------|
| <b>...in<br/>advancing my<br/>career</b>      | <input type="radio"/> | <input type="radio"/> | <input type="radio"/> | <input type="radio"/> | <input type="radio"/> |
| <b>...in<br/>advancing<br/>science</b>        | <input type="radio"/> | <input type="radio"/> | <input type="radio"/> | <input type="radio"/> | <input type="radio"/> |
| <b>...to my<br/>personal<br/>satisfaction</b> | <input type="radio"/> | <input type="radio"/> | <input type="radio"/> | <input type="radio"/> | <input type="radio"/> |

---

Feel free to leave a comment (optional)

---

End of Block: Statements

---

Start of Block: End

Do you have any other comments or thoughts you would like to share with us? (optional)

---

End of Block: End

---
