# Supplementary material for: Advancing science or advancing careers? Researchers’ opinions on success indicators
Source: bioRxiv or medRxiv preprint supplement (doi:10.1101/2020.06.22.165654), 2020-11-24
Supplement: Supplementary file [file media-4.pdf]

# SUPPLEMENTARY TABLE S4

## ANALYSIS RESULTS FOR RATINGS OF THE DIMENSIONAL IMPORTANCE OF THE 18 SUCCESS INDICATORS

Bonferroni post hoc pairwise comparisons

| Statement                                                             | Mean rating for each dimension                      | Result*                                       | Career vs Science          | Career vs Satisfaction     | Science vs Satisfaction    |
|-----------------------------------------------------------------------|-----------------------------------------------------|-----------------------------------------------|----------------------------|----------------------------|----------------------------|
| Publishing papers is...                                               | Career: 4.52<br>Science: 4.37<br>Satisfaction: 3.90 | (SA) $F(2,250) = 38.188, p < 0.001$           | $p = 0.048$<br>md = 0.151  | $p < 0.001$<br>md = 0.627  | $p < 0.001$<br>md = 0.479  |
| Publishing in high impact journals is...                              | Career: 4.31<br>Science: 3.73<br>Satisfaction: 3.67 | (SA) $F(2,250) = 36.701, p < 0.001$           | $p < 0.001$<br>md = 0.579  | $p < 0.001$<br>md = 0.643  | $p = 0.444$<br>md = 0.063  |
| Publishing commentaries or editorials is...                           | Career: 3.48<br>Science: 3.70<br>Satisfaction: 3.34 | (SA) $F(2,250) = 14.538, p < 0.001$           | $p = 0.002$<br>md = -0.222 | $p = 0.049$<br>md = 0.135  | $p < 0.001$<br>md = 0.357  |
| Publishing more papers than others is...                              | Career: 3.83<br>Science: 2.89<br>Satisfaction: 3.01 | (GG) $F(1.779,222.388) = 70.233, p < 0.001$   | $p < 0.001$<br>md = 0.944  | $p < 0.001$<br>md = 0.825  | $p = 0.092$<br>md = -.119  |
| Publishing open access is...                                          | Career: 3.48<br>Science: 4.35<br>Satisfaction: 3.67 | (SA) $F(2,250) = 62.624, p < 0.001$           | $p < 0.001$<br>md = -0.865 | $p = 0.025$<br>md = -0.190 | $p < 0.001$<br>md = 0.675  |
| Peer reviewing is...                                                  | Career: 3.39<br>Science: 4.43<br>Satisfaction: 3.47 | (SA) $F(2,250) = 81.399, p < 0.001$           | $p < 0.001$<br>md = -1.040 | $p = 0.386$<br>md = -0.079 | $p < 0.001$<br>md = -0.960 |
| Replicating past research is...                                       | Career: 2.83<br>Science: 3.98<br>Satisfaction: 3.09 | (GG) $F(1.847,230.832) = 81.530, p < 0.001$   | $p < 0.001$<br>md = -1.151 | $p = 0.008$<br>md = -0.254 | $p < 0.001$<br>md = -0.897 |
| Publishing findings that did not work (i.e., negative findings) is... | Career: 2.84<br>Science: 4.48<br>Satisfaction: 3.61 | (GG) $F(1.820, 227.487) = 187.113, p < 0.001$ | $p < 0.001$<br>md = -1.643 | $p < 0.001$<br>md = -0.770 | $p < 0.001$<br>md = 0.873  |
| Sharing your full data and detailed methods is...                     | Career: 3.29<br>Science: 4.40<br>Satisfaction: 3.67 | (GG) $F(1.906,238.310) = 106.656$             | $p < 0.001$<br>md = -1.119 | $p < 0.001$<br>md = -0.389 | $p < 0.001$<br>md = 0.730  |
| Reviewing raw data from students and collaborators is...              | Career: 3.37<br>Science: 4.20<br>Satisfaction: 3.64 | (SA) $F(2,250) = 50.707, p < 0.001$           | $p < 0.001$<br>md = -0.825 | $p = 0.003$<br>md = -0.270 | $p < 0.001$<br>md = 0.556  |
| Conducting innovative research with a high risks of failure is...     | Career: 3.29<br>Science: 4.47<br>Satisfaction: 3.91 | (GG) $F(1.614, 201.766) = 66.452, p < 0.001$  | $p < 0.001$<br>md = -1.175 | $p < 0.001$<br>md = -0.619 | $p < 0.001$<br>md = 0.556  |
| Connecting with renowned researchers is...                            | Career: 4.35<br>Science: 3.91<br>Satisfaction: 3.98 | (SA) $F(2,250) = 24.566, p < 0.001$           | $p < 0.001$<br>md = 0.437  | $p < 0.001$<br>md = 0.373  | $p = 0.304$<br>md = -0.063 |
| Collaborating across borders, disciplines, and sectors is...          | Career: 4.25<br>Science: 4.64<br>Satisfaction: 4.36 | (GG) $F(1.558,195.781) = 14.565, p < 0.001$   | $p < 0.001$<br>md = -0.389 | $p = 0.235$<br>md = -0.103 | $p < 0.001$<br>md = 0.286  |
| Getting cited in scientific literature is...                          | Career: 4.46<br>Science: 3.66<br>Satisfaction: 3.98 | (GG) $F(1.890,236.280) = 55.630, p < 0.001$   | $p < 0.001$<br>md = 0.802  | $p < 0.001$<br>md = 0.484  | $p < 0.001$<br>md = -0.317 |

|                                                               |                                                     |                                     |                            |                            |                            |
|---------------------------------------------------------------|-----------------------------------------------------|-------------------------------------|----------------------------|----------------------------|----------------------------|
| Having your papers read and downloaded is...                  | Career: 3.90<br>Science: 3.90<br>Satisfaction: 4.10 | (SA) $F(2,250) = 4.873, p = 0.008$  | $p = 1.000$<br>md = 0.000  | $p = 0.011$<br>md = -0.206 | $p = 0.003$<br>md = -0.206 |
| Having public outreach (e.g., social media, news, etc.) is... | Career: 3.84<br>Science: 3.77<br>Satisfaction: 3.72 | (SA) $F(2,250) = 1.251, p = 0.288$  | ————                       | ————                       | ————                       |
| Having your results used or implemented in practice is...     | Career: 4.02<br>Science: 4.26<br>Satisfaction: 4.37 | (SA) $F(2,250) = 12.875, p < 0.001$ | $p = 0.001$<br>md = -0.238 | $p < 0.001$<br>md = -0.341 | $p = 0.118$<br>md = -0.103 |
| Having luck is...                                             | Career: 4.27<br>Science: 4.02<br>Satisfaction: 3.39 | (SA) $F(2,250) = 14.229, p < 0.001$ | $p < 0.001$<br>md = 0.246  | $p < 0.001$<br>md = 0.381  | $p = 0.091$<br>md = 0.135  |

---

\* We report Greenhouse-Geisser (GG) tests when the results of Mauchly's test of sphericity could not confirm the sphericity of the data. Otherwise, Sphericity Assumed (SA) tests are reported. md = mean difference
